# Supplementary material for: A “H2O donating/methanol accepting” platform for preparation of highly selective Nafion-based proton exchange membranes
Source: Royal Society of Chemistry journal article supplement (doi:10.1039/c5ta04916d), 2015-01-01
Supplement: c5ta04916d1.pdf [file c5ta04916d1.pdf]

Electronic Supporting Information for

# A “H<sub>2</sub>O donating/methanol accepting” platform for preparation of highly selective Nafion-based proton exchange membranes

Kai Feng, Beibei Tang\* and Peiyi Wu\*

State Key Laboratory of Molecular Engineering of Polymers, Collaborative Innovation Center of Polymers and Polymer Composite Materials, Department of Macromolecular Science and Laboratory of Advanced Materials, Fudan University, Shanghai 200433, People’s Republic of China.

E-mail: bbtang@fudan.edu.cn and peiyiwu@fudan.edu.cn. Tel.: +86-21-65643255. Fax: +86-21-65640293.

1.

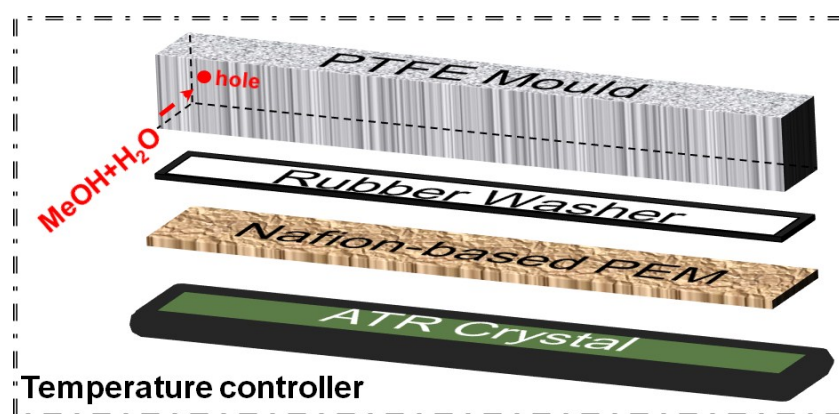

**Fig. S1** Schematic illustration of the home-made equipment used to characterize the methanol permeability of PEMs.

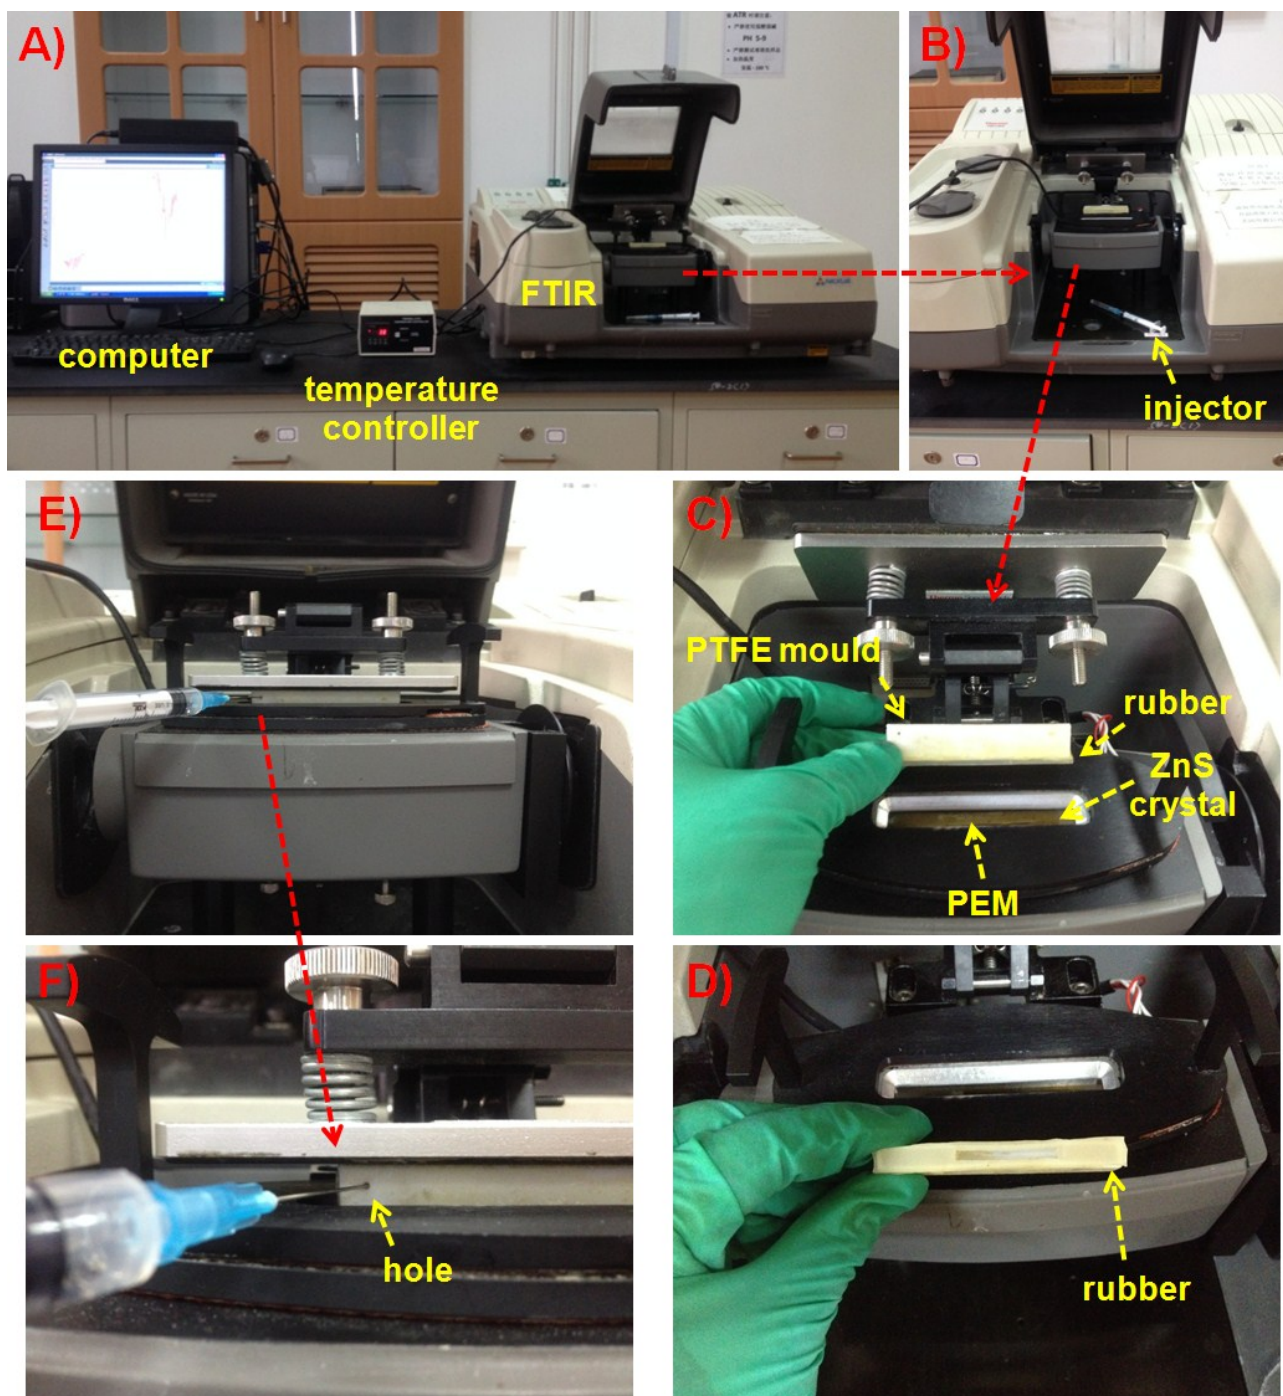

**Fig. S2** (A) A digital photo of the whole set used to characterize the methanol permeability of PEMs; (B-D) Magnified observation of some important components, such as the PTFE mould, ZnS crystal and rubber washer, *etc.*; (E-F) Digital photos of the assembly of different components as illustrated in Fig. S1.

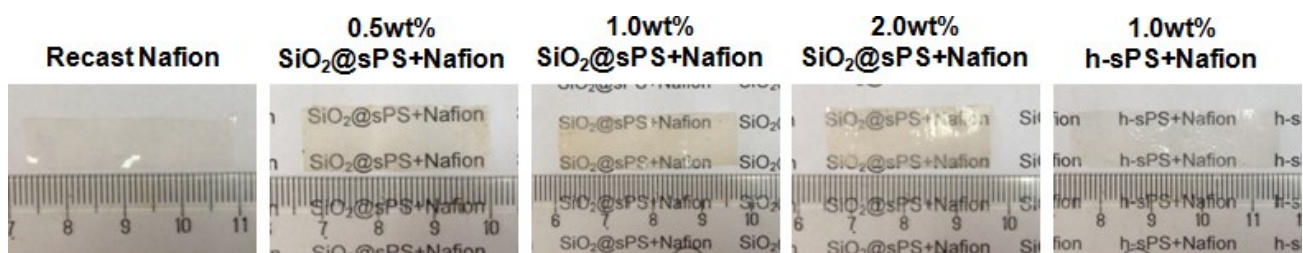

**Fig. S3** Digital photos of the recast Nafion, 0.5~2.0 wt% SiO<sub>2</sub>@sPS+Nafion and 1.0 wt% h-sPS+Nafion membranes.

**Table S1** Detailed information about the optimized proton conductivity of Nafion-based PEMs modified by various other sulfonated materials.

| Composite PEMs                                          | Proton conductivity (S/cm) | Conditions  | Publications |   |
|---------------------------------------------------------|----------------------------|-------------|--------------|---|
| MMT-SO <sub>3</sub> H (1, 4-BS) + Nafion                | 0.081                      | 30°C-98%RH  | 1            |   |
|                                                         | 0.11                       | 50°C-98%RH  |              |   |
| MMT-SO <sub>3</sub> H (1, 3-PS) + Nafion                | 0.075                      | 30°C-98%RH  |              |   |
|                                                         | 0.112                      | 50°C-98%RH  |              |   |
| MMT-SO <sub>3</sub> H (FMES) + Nafion                   | 0.088                      | 30°C-98%RH  |              |   |
|                                                         | 0.128                      | 50°C-98%RH  |              |   |
| Laponite-SO <sub>3</sub> H + Nafion                     | 0.0025                     | 25°C-50%RH  |              | 2 |
|                                                         | 0.0035                     | 25°C-60%RH  |              |   |
|                                                         | 0.0045                     | 25°C-70%RH  |              |   |
|                                                         | 0.016                      | 25°C-80%RH  |              |   |
|                                                         | 0.022                      | 25°C-90%RH  |              |   |
|                                                         | 0.028                      | 25°C-95%RH  |              |   |
|                                                         | 0.03                       | 25°C-98%RH  |              |   |
|                                                         | 0.039                      | 50°C-98%RH  |              |   |
|                                                         | 0.052                      | 65°C-98%RH  |              |   |
|                                                         | 0.07                       | 80°C-98%RH  |              |   |
| PSSA-Nafion                                             | 0.082                      | 95°C-98%RH  | 3            |   |
|                                                         | 0.032                      | r.t.-100%RH |              |   |
| mesoporous SiO <sub>2</sub> -SO <sub>3</sub> H + Nafion | 0.088                      | 40°C-95%RH  | 4            |   |
|                                                         | 0.101                      | 50°C-95%RH  |              |   |
|                                                         | 0.115                      | 60°C-95%RH  |              |   |
|                                                         | 0.125                      | 70°C-95%RH  |              |   |
|                                                         | 0.127                      | 80°C-95%RH  |              |   |
|                                                         | 0.113                      | 90°C-95%RH  |              |   |
| Nafion + Sulfonated poly(propylene oxide) oligomers     | 0.108                      | 100°C-95%RH | 5            |   |
|                                                         | 0.104                      | r.t.-100%RH |              |   |
| Sulfonated β-cyclodextrin + Nafion                      | 0.0125                     | 10°C-100%RH | 6            |   |
|                                                         | 0.014                      | 20°C-100%RH |              |   |
|                                                         | 0.016                      | 30°C-100%RH |              |   |
|                                                         | 0.019                      | 40°C-100%RH |              |   |
|                                                         | 0.021                      | 50°C-100%RH |              |   |
|                                                         | 0.023                      | 60°C-100%RH |              |   |
|                                                         | 0.026                      | 70°C-100%RH |              |   |
|                                                         | 0.029                      | 80°C-100%RH |              |   |
| zeolite beta-SO <sub>3</sub> H + Nafion                 | 0.047                      | 21°C-100%RH | 7            |   |
|                                                         | 0.067                      | 80°C-100%RH |              |   |
| Polysilsesquioxane-SO <sub>3</sub> H + Nafion           | 0.048                      | 30°C-90%RH  | 8            |   |
|                                                         | 0.103                      | 30°C-100%RH |              |   |
|                                                         | 0.123                      | 50°C-100%RH |              |   |
|                                                         | 0.145                      | 70°C-100%RH |              |   |
|                                                         | 0.152                      | 80°C-100%RH |              |   |
|                                                         | 0.09                       | 80°C-90%RH  |              |   |
|                                                         | 0.014                      | 80°C-40%RH  |              |   |
|                                                         | 0.02                       | 120°C-40%RH |              |   |
| 0.16                                                    | 120°C-90%RH                |             |              |   |

**Table S1** (continued)

| Composite PEMs                                          | Proton conductivity (S/cm) | Conditions   | Publications |
|---------------------------------------------------------|----------------------------|--------------|--------------|
| MWCNT-SO <sub>3</sub> H + Nafion                        | 0.082                      | 25°C-100%RH  | 9            |
|                                                         | 0.086                      | 40°C-100%RH  |              |
|                                                         | 0.085                      | 60°C-100%RH  |              |
|                                                         | 0.058                      | 80°C-100%RH  |              |
|                                                         | 0.030                      | 100°C-100%RH |              |
|                                                         | 0.027                      | 120°C-100%RH |              |
| SiO <sub>2</sub> -SO <sub>3</sub> H + Nafion            | 0.083                      | 30°C-100%RH  | 10           |
|                                                         | 0.103                      | 40°C-100%RH  |              |
|                                                         | 0.125                      | 50°C-100%RH  |              |
|                                                         | 0.155                      | 60°C-100%RH  |              |
|                                                         | 0.175                      | 70°C-100%RH  |              |
|                                                         | 0.200                      | 80°C-100%RH  |              |
|                                                         | 0.079                      | 80°C-40%RH   |              |
|                                                         | 0.207                      | 90°C-100%RH  |              |
| mesoporous SiO <sub>2</sub> -SO <sub>3</sub> H + Nafion | 0.218                      | 100°C-100%RH | 11           |
|                                                         | 0.039                      | 60°C-60%RH   |              |
|                                                         | 0.08                       | 60°C-80%RH   |              |
| Montmorillonite-SO <sub>3</sub> H + Nafion              | 0.13                       | 60°C-98%RH   | 12           |
|                                                         | 0.08                       | 30°C-98%RH   |              |
|                                                         | 0.106                      | 50°C-98%RH   |              |
|                                                         | 0.141                      | 75°C-98%RH   |              |
|                                                         | 0.161                      | 90°C-98%RH   |              |
| mesoporous SiO <sub>2</sub> -SO <sub>3</sub> H + Nafion | 0.013                      | r.t.-100%RH  | 13           |
|                                                         | 0.011                      | 25°C-100%RH  |              |
| Laponite-PSSA + Nafion                                  | 0.03                       | 55°C-100%RH  | 14           |
|                                                         | 0.05                       | 85°C-100%RH  |              |

**Table S1** (continued)

| Composite PEMs                               | Proton conductivity (S/cm) | Conditions   | Publications |
|----------------------------------------------|----------------------------|--------------|--------------|
| ZrO <sub>2</sub> -SO <sub>3</sub> H + Nafion | 0.0077                     | 80°C-20%RH   | 15           |
|                                              | 0.0336                     | 80°C-50%RH   |              |
|                                              | 0.0684                     | 80°C-70%RH   |              |
|                                              | 0.0063                     | 120°C-20%RH  |              |
|                                              | 0.0448                     | 120°C-50%RH  |              |
|                                              | 0.0965                     | 120°C-70%RH  |              |
|                                              | 0.0066                     | 80°C-20%RH   |              |
| SBA15 + Nafion                               | 0.0259                     | 80°C-50%RH   |              |
|                                              | 0.0482                     | 80°C-70%RH   |              |
|                                              | 0.0065                     | 120°C-20%RH  |              |
|                                              | 0.0429                     | 120°C-50%RH  |              |
|                                              | 0.0883                     | 120°C-70%RH  |              |
|                                              | 0.0058                     | 80°C-20%RH   |              |
|                                              | 0.028                      | 80°C-50%RH   |              |
| MCM41 + Nafion                               | 0.0504                     | 80°C-70%RH   |              |
|                                              | 0.0053                     | 120°C-20%RH  |              |
|                                              | 0.0337                     | 120°C-50%RH  |              |
|                                              | 0.0718                     | 120°C-70%RH  |              |
|                                              | 0.0026                     | 80°C-20%RH   |              |
|                                              | 0.023                      | 80°C-50%RH   |              |
|                                              | 0.0394                     | 80°C-70%RH   |              |
| Si-SO <sub>3</sub> H + Nafion                | 0.0039                     | 120°C-20%RH  |              |
|                                              | 0.0268                     | 120°C-50%RH  |              |
|                                              | 0.0586                     | 120°C-70%RH  |              |
|                                              | 0.010                      | 80°C-20%RH   |              |
|                                              | 0.0391                     | 80°C-50%RH   |              |
|                                              | 0.0622                     | 80°C-70%RH   |              |
|                                              | 0.0087                     | 120°C-20%RH  |              |
| Phosphosilicate + Nafion (P:S=0.5)           | 0.051                      | 120°C-50%RH  |              |
|                                              | 0.1035                     | 120°C-70%RH  |              |
|                                              | 0.0056                     | 80°C-20%RH   |              |
|                                              | 0.026                      | 80°C-50%RH   |              |
|                                              | 0.0492                     | 80°C-70%RH   |              |
|                                              | 0.0044                     | 120°C-20%RH  |              |
|                                              | 0.0363                     | 120°C-50%RH  |              |
| Phosphosilicate + Nafion (P:S=1)             | 0.0798                     | 120°C-70%RH  |              |
|                                              | 0.0069                     | 80°C-20%RH   |              |
|                                              | 0.0298                     | 80°C-50%RH   |              |
|                                              | 0.0627                     | 80°C-70%RH   |              |
|                                              | 0.0067                     | 120°C-20%RH  |              |
|                                              | 0.0402                     | 120°C-50%RH  |              |
|                                              | 0.0898                     | 120°C-70%RH  |              |
| TiO <sub>2</sub> -SO <sub>3</sub> H + Nafion | 0.05                       | 100°C-40%RH  | 16           |
|                                              | 0.18                       | 100°C-100%RH |              |
| Al-MSU-F + Nafion                            | 0.1                        | 120°C-40%RH  | 17           |
|                                              | 0.099                      | 30°C-100%RH  |              |
| Al-HMS + Nafion                              | 0.134                      | 80°C-100%RH  |              |
|                                              | 0.125                      | 30°C-100%RH  |              |
| Al-MCM-41 + Nafion                           | 0.148                      | 80°C-100%RH  |              |
|                                              | 0.185                      | 30°C-100%RH  |              |
|                                              | 0.291                      | 80°C-100%RH  |              |

**Table S1** (continued)

| Composite PEMs                 | Proton conductivity (S/cm) | Conditions  | Publications |
|--------------------------------|----------------------------|-------------|--------------|
| PSSA-g-PVDF + Nafion           | 0.064                      | 20°C-95%RH  | 18           |
|                                | 0.072                      | 40°C-95%RH  |              |
|                                | 0.082                      | 60°C-95%RH  |              |
|                                | 0.093                      | 80°C-95%RH  |              |
|                                | 0.106                      | 95°C-95%RH  |              |
| SiO <sub>2</sub> @sPS + Nafion | 0.196                      | 25°C-100%RH | This work    |
|                                | 0.216                      | 30°C-100%RH |              |
|                                | 0.249                      | 50°C-100%RH |              |
|                                | 0.253                      | 70°C-100%RH |              |
|                                | 0.260                      | 90°C-100%RH |              |
| h-sPS + Nafion                 | 0.0216                     | 100°C-40%RH |              |
|                                | 0.0285                     | 100°C-40%RH |              |

### Notes and references

- 1 Y. Kim, J. S. Lee, C. H. Rhee, H. K. Kim and H. Chang, *J. Power Sources*, 2006, **162**, 180-185.
- 2 P. Bébin, M. Caravanier and H. Galiano, *J. Membr. Sci.*, 2006, **278**, 35-42.
- 3 B. Bae, H. Y. Ha and D. Kim, *J. Membr. Sci.*, 2006, **276**, 51-58.
- 4 Y. Tominaga, I. C. Hong, S. Asai and M. Sumita, *J. Power Sources*, 2007, **171**, 530-534.
- 5 Y.-F. Lin, Y.-H. Hsiao, C.-Y. Yen, C.-L. Chiang, C.-H. Lee, C.-C. Huang and C.-C. M. Ma, *J. Power Sources*, 2007, **172**, 570-577.
- 6 J. D. Jeon and S. Y. Kwak, *J. Power Sources*, 2008, **185**, 49-54.
- 7 B. A. Holmberg, X. Wang and Y. Yan, *J. Membr. Sci.*, 2008, **320**, 86-92.
- 8 K. Xu, C. Chanthad, M. R. Gadinski, M. A. Hickner and Q. Wang, *ACS Appl. Mater. Interfaces*, 2009, **1**, 2573-2579.
- 9 R. Kannan, M. Parthasarathy, S. U. Maraveedu, S. Kurungot and V. K. Pillai, *Langmuir*, 2009, **25**, 8299-8305.
- 10 G. Gnana Kumar, A. R. Kim, K. Suk Nahm and R. Elizabeth, *Int. J. Hydrogen Energy*, 2009, **34**, 9788-9794.
- 11 Y. Choi, Y. Kim, H. K. Kim and J. S. Lee, *J. Membr. Sci.*, 2010, **357**, 199-205.
- 12 Y. Kim, Y. Choi, H. K. Kim and J. S. Lee, *J. Power Sources*, 2010, **195**, 4653-4659.
- 13 C. H. Tsai, H. J. Lin, H. M. Tsai, J. T. Hwang, S. M. Chang and Y. W. Chen-Yang, *Int. J. Hydrogen Energy*, 2011, **36**, 9831-9841.
- 14 K. Fatyeyeva, C. Chappey, F. Poncin-Epaillard, D. Langevin, J.-M. Valleton and S. Marais, *J. Membr. Sci.*, 2011, **369**, 155-166.
- 15 C. M. Wang, E. Chalkova, J. K. Lee, M. V. Fedkin, S. Komarneni and S. N. Lvov, *J. Electrochem. Soc.*, 2011, **158**, B690-B697.
- 16 Y. Jun, H. Zarrin, M. Fowler and Z. Chen, *Int. J. Hydrogen Energy*, 2011, **36**, 6073-6081.
- 17 S. Meenakshi, A. K. Sahu, S. D. Bhat, P. Sridhar, S. Pitchumani and A. K. Shukla, *Electrochim. Acta*, 2013, **89**, 35-44.
- 18 H. Y. Li, Y. Y. Lee, J. Y. Lai and Y. L. Liu, *J. Membr. Sci.*, 2014, **466**, 238-245.
